# Supplementary material
Source: Research Square preprint supplement (doi:10.21203/rs.3.rs-9209433/v1)
Supplement: Supplementary file 1 [file 9bec0807fdf964f68c1c725f.docx]

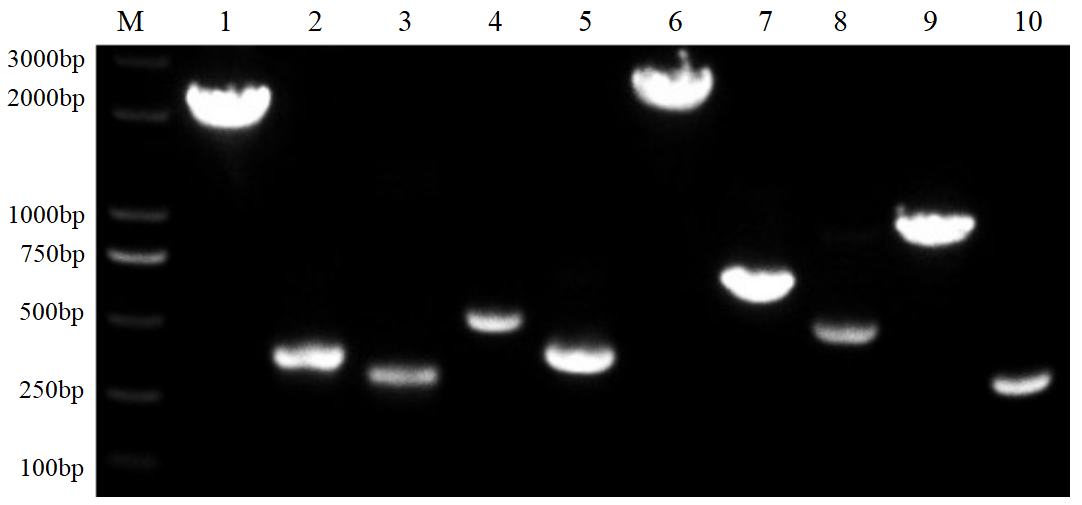


Figure S1. PCR amplification of all fragments for pSC101-PBAD-sgRNA-ORF4-GFP plasmid was verified by 1.0% agarose gel electrophoresis

A StarMarker D2000 Pius was used as the molecular weight marker (Lane M). Lanes 1–10 showed specific bands corresponding to the expected sizes of the fragments amplified by yw1-F/R, yw2-F/R, yw3-F/R, LHA-F/R, QDZ-F/R, ORF4-F/R, GFP-F/R, RHA-F/R, yw4-F/R and yw5-F/R primers, respectively, indicating successful amplification of all target fragments with no non-specific products. All fragments were gel-purified and used for subsequent plasmid construction via Gibson assembly.

Sequencing Results of the Constructed Plasmid pSC101-PBAD-sgRNA-ORF4-GFP（8711 bp）.

TTCTAAAGGTAGTTTCTACTATAAACCAAATGATACAACTCATAAAGACCAATTGGAGTACAATGAATCAGCTCCTTTTGAAAGCAACAACTATACTGCCTTGTTAACACAATCAGCGTCTTGGGGCTATGTTGATTATGTCAAAAATGGTGGGGAGTTAGAATTAGCACCGGAGAGTCCAAAAAGAATTATTTTAGGAACTTTTGAGAATAAGGTTGAGGATAAAACAATTCATCTTTTGGAAAGAGATGCAGCGAATAATCCATATTTTGCCATTTCTCCAAATAAAGATGGAAATAGGGATGAAATCACTCCCCAGGCAACTTTCTTAAGAAATGTTAAGGATATTTCTGCTCAAGTTCTAGATCAAAATGGAAATGTTATTTGGCAAAGTAAGGTTTTACCATCTTATCGTAAAAATTTCCATAATAATCCAAAGCAAAGTGATGGTCATTATCGTATGGATGCCCTTCAGTGGAGTGGTTTAGATAAGGATGGCAAAGTTGTAGCAGATGGTTTTTATACTTATCGTTTACGTTACACACCAGTAGCAGAAGGAGCAAATAGTCAGGAGTCAGACTTTAAAGTTCAAGTAAGTACTAAGTCACCAAATCTTCCTTCACGAGCTCAGTTTGATGAAACTAATCGAACATTAAGCTTAGCCATGCCTAAGGAAAGTAGTTATGTTCCTACATATCGTCTACAATTAGTTTTATCTCATGTTGTAAAAGATGAAGAATATGGAGATGAGACTTCTTACCATTATTTCCATATAGATCAAGAAGGTAAAGTGACACTTCCTAAAACAGTTAAGATAGGAGAGAGTGAGGTTGCAGTAGACCCTAAGACCTTGACACTTGTTGTGGAAGATAAAGCTGGTAATTTCGCAACGGTAAAATTGTCTGACCTCTTGAATAAGGCAGTAGTATCAGAGAAAGAAAACGCTATAGTAATTTCTAACAATTTCAAATATTTTGATAACTTGAAAAAAGAACCTATGTTTATTTCTAAAGAAGGAAAAGTAGTAAACAAGAATCTAGAAGAAATAGCATTAGTTAAGCCGCAAACTACAGTTACTACTCAATCATTGTCTAAAGAAATAACTCAATCAGGAAATGAGAAAGTCCTCACTTCTACAAACAATAATAGTAGCAGAGTAGCTAAGATCATATCACCTAAACATAACGGGGATTCTGTTAACCATACCTTACCTAGTACATCAGATAGAGCAACGAATGGTCTATTTGTTGGTACTTTGGCATTGTTATCTAGTTTACTTCTTTACTTGAAACCCAAAAAGACTAAAAATAATAGTAAAGGCGGTGGTGGCGGCTCCGGCGGTATGAGCAAAGGAGAAGAACTTTTCACTGGAGTTGTCCCAATTCTTGTTGAATTAGATGGTGATGTTAATGGGCACAAATTTTCTGTCCGTGGAGAGGGTGAAGGTGATGCTACAAACGGAAAACTCACCCTTAAATTTATTTGCACTACTGGAAAACTACCTGTTCCGTGGCCAACACTTGTCACTACTCTGACCTATGGTGTTCAATGCTTTTCCCGTTATCCGGATCACATGAAACGGCATGACTTTTTCAAGAGTGCCATGCCCGAAGGTTATGTACAGGAACGCACTATATCTTTCAAAGATGACGGGACCTACAAGACGCGTGCTGAAGTCAAGTTTGAAGGTGATACCCTTGTTAATCGTATCGAGTTAAAGGGTATTGATTTTAAAGAAGATGGAAACATTCTTGGACACAAACTCGAGTACAACTTTAACTCACACAATGTATACATCACGGCAGACAAACAAAAGAATGGAATCAAAGCTAACTTCAAAATTCGCCACAACGTTGAAGATGGTTCCGTTCAACTAGCAGACCATTATCAACAAAATACTCCAATTGGCGATGGCCCTGTCCTTTTACCAGACAACCATTACCTGTCGACACAATCTGTCCTTTCGAAAGATCCCAACGAAAAGCGTGACCACATGGTCCTTCTTGAGTTTGTAACTGCTGCTGGGATTACACATGGCATGGATGAGCTCTACAAATAGCCGATCAATGGGGATTGGTGGCGACGACTCCTGGAGCCCGTCAGTATCGGCGGAATTCCAGCTGAGCGCCGGTCGCTACCATTACCAGTTGGTCTGGTGTCAAAAATAATAATAACCGGGCAGGCCATGTCTGCCCGTATTTCGCGTAAGGAAATCCATTATGTACTATTTAAAAAACACAAACTTTTGGATGTTCGGTTTATTCTTTTTCTTTTACTTTTTTATCATGGGAGCCTACTTCCCGTTTTTCCCGATTTGGCTACATGACATCAACCATATCAGCAAAAGTGATACGGGTATTATTTTTGCCGCTATTTCTCTGTTCTCGCTATTATTCCAACCGCTGTTTGGTCTGCTTTCTGACAAACTCGGGCTGCGCAAATACCTGCTGTGGATTATTACCGGCATGTTAGTGATGTTTGCGCCGTTCTTTATTTTTATCTTCGGGCCACTGTTACAATACAACATTTTAGTAGGATCGATTGTTGGTGGTATTTATCTAGGCTTCCCCATATGGAAACCGTCGATATCGCGGAACCCCTATTTGTTTATTTTTCTAAATACATTCAAATATGTATCCGCTCATGAGACAATAACCCTGATAAATGCTTCAATAATATTGAAAAAGGAAGAGTATGAGTATTCAACATTTCCGTGTCGCCCTTATTCCCTTTTTTGCGGCATTTTGCCTTCCTGTTTTTGCTCACCCAGAAACGCTGGTGAAAGTAAAAGATGCTGAAGATCAGTTGGGTGCACGAGTGGGTTACATCGAACTGGATCTCAACAGCGGTAAGATCCTTGAGAGTTTTCGCCCCGAAGAACGTTTTCCAATGATGAGCACTTTTAAAGTTCTGCTATGTGGCGCGGTATTATCCCGTATTGACGCCGGGCAAGAGCAACTCGGTCGCCGCATACACTATTCTCAGAATGACTTGGTTGAGTACTCACCAGTCACAGAAAAGCATCTTACGGATGGCATGACAGTAAGAGAATTATGCAGTGCTGCCATAACCATGAGTGATAACACTGCGGCCAACTTACTTCTGACAACGATCGGAGGACCGAAGGAGCTAACCGCTTTTTTGCACAACATGGGGGATCATGTAACTCGCCTTGATCGTTGGGAACCGGAGCTGAATGAAGCCATACCAAACGACGAGCGTGACACCACGATGCCTGTAGCAATGGCAACAACGTTGCGCAAACTATTAACTGGCGAACTACTTACTCTAGCTTCCCGGCAACAATTAATAGACTGGATGGAGGCGGATAAAGTTGCAGGACCACTTCTGCGCTCGGCCCTTCCGGCTGGCTGGTTTATTGCTGATAAATCTGGAGCCGGTGAGCGTGGGTCTCGCGGTATCATTGCAGCACTGGGGCCAGATGGTAAGCCCTCCCGTATCGTAGTTATCTACACGACGGGGAGTCAGGCAACTATGGATGAACGAAATAGACAGATCGCTGAGATAGGTGCCTCACTGATTAAGCATTGGTAACTGTCAGACCAAGTTTACTCATATATACTTTAGATTGATTTAAAACTTCATTTTTAATTTAAAAGGATCTAGGTGAAGATCCTTTTTGATAATCTCATGACCAAAATCCCTTAACGTGAGTTTTCGTTCCACACTTTTCATACTCCCGCCATTCAGAGAAGAAACCAATTGTCCATATTGCATCAGACATTGCCGTCACTGCGTCTTTTACTGGCTCTTCTCGCTAACCAAACCGGTAACCCCGCTTATTAAAAGCATTCTGTAACAAAGCGGGACCAAAGCCATGACAAAAACGCGTAACAAAAGTGTCTATAATCACGGCAGAAAAGTCCACATTGATTATTTGCACGGCGTCACACTTTGCTATGCCATAGCATTTTTATCCATAAGATTAGCGGATCCTACCTGACGCTTTTTATCGCAACTCTCTACTGTTTCTCCATAGTTGTTGTGCCACGCGGTTGTTTTAGAGCTAGAAATAGCAAGTTAAAATAAGGCTAGTCCGTTATCAACTTGAAAAAGTGGCACCGAGTCGGTGCTTAGCATCCAAACTCGAGTAAGGATCATTAAGGATCCCATGGTACGCGTGCTAGAGGCATCAAATAAAACGAAAGGCTCAGTCGAAAGACTGGGCCTTTCGTTTTATCTGTTGTTTGTCGGTGAACGCTCTCCCGAGTAGGACAAATCCGCCCCATGGGTATGGACAGTTTTCCCTTTGATATGTAACGGTGAACAGTTGTTCTACTTTTGTTTGTTAGTCTTGATGCTTCACTGATAGATACAAGAGCCATAAGAACCTCAGATCCTTCCGTATTTAGCCAGTATGTTCTCTAGTGTGGTTCGTTGTTTTTGCGTGAGCCATGAGAACGAACCATTGAGATCATACTTACTTTGCATGTCACTCAAAAATTTTGCCTCAAAACTGGTGAGCTGAATTTTTGCAGTTAAAGCATCGTGTAGTGTTTTTCTTAGTCCGTTATGTAGGTAGGAATCTGATGTAATGGTTGTTGGTATTTTGTCACCATTCATTTTTATCTGGTTGTTCTCAAGTTCGGTTACGAGATCCATTTGTCTATCTAGTTCAACTTGGAAAATCAACGTATCAGTCGGGCGGCCTCGCTTATCAACCACCAATTTCATATTGCTGTAAGTGTTTAAATCTTTACTTATTGGTTTCAAAACCCATTGGTTAAGCCTTTTAAACTCATGGTAGTTATTTTCAAGCATTAACATGAACTTAAATTCATCAAGGCTAATCTCTATATTTGCCTTGTGAGTTTTCTTTTGTGTTAGTTCTTTTAATAACCACTCATAAATCCTCATAGAGTATTTGTTTTCAAAAGACTTAACATGTTCCAGATTATATTTTATGAATTTTTTTAACTGGAAAAGATAAGGCAATATCTCTTCACTAAAAACTAATTCTAATTTTTCGCTTGAGAACTTGGCATAGTTTGTCCACTGGAAAATCTCAAAGCCTTTAACCAAAGGATTCCTGATTTCCACAGTTCTCGTCATCAGCTCTCTGGTTGCTTTAGCTAATACACCATAAGCATTTTCCCTACTGATGTTCATCATCTGAACGTATTGGTTATAAGTGAACGATACCGTCCGTTCTTTCCTTGTAGGGTTTTCAATCGTGGGGTTGAGTAGTGCCACACAGCATAAAATTAGCTTGGTTTCATGCTCCGTTAAGTCATAGCGACTAATCGCTAGTTCATTTGCTTTGAAAACAACTAATTCAGACATACATCTCAATTGGTCTAGGTGATTTTAATCACTATACCAATTGAGATGGGCTAGTCAATGATAATTACTAGTCCTTTTCCTTTGAGTTGTGGGTATCTGTAAATTCTGCTAGACCTTTGCTGGAAAACTTGTAAATTCTGCTAGACCCTCTGTAAATTCCGCTAGACCTTTGTGTGTTTTTTTTGTTTATATTCAAGTGGTTATAATTTATAGAATAAAGAAAGAATAAAAAAAGATAAAAAGAATAGATCCTAGCCCTGTGTATAACTCACTACTTTAGTCAGTTCCGCAGTATTACAAAAGGATGTCGCAAACGCTGTTTGCTCCTCTACAAAACAGACCTTAAAACCCTAAAGGCTTAAGTAGCACCCTCGCAAGCTCGGTTGCGGCCGCAATCGGGCAAATCGCTGAATATTCCTTTTGTCTCCGACCATCAGGCACCTGAGTCGCTGTCTTTTTCGTGACATTCAGTTCGCTGCGCTCACGGCTCTGGCAGTGAATGGGGGTAAATGGCACTACAGGCGCCTTTTATGGATTCATGCAAGGAAACTACCCATAATACAAGAAAAGCCCGTCACGGGCTTCTCAGGGCGTTTTATGGCGGGTCTGCTATGTGGTGCTATCTGACTTTTTGCTGTTCAGCAGTTCCTGCCCTCTGATTTTCCAGTCTGACCACTTCGGATTATCCCGTGACAGGTCATTCAGACTGGCTAATGCACCCAGTAAGGCAGCGGTATCATCAACGGGGTCTGACGCTCAGTGGAACGAAAACTCACGTTAAGGGATTTTGGTCATGAGATTATCAAAAAGGATTAGGGATAACAGGGTAATACTTTTCATACTCCCGCCATTCAGAGAAGAAACCAATTGTCCATATTGCATCAGACATTGCCGTCACTGCGTCTTTTACTGGCTCTTCTCGCTAACCAAACCGGTAACCCCGCTTATTAAAAGCATTCTGTAACAAAGCGGGACCAAAGCCATGACAAAAACGCGTAACAAAAGTGTCTATAATCACGGCAGAAAAGTCCACATTGATTATTTGCACGGCGTCACACTTTGCTATGCCATAGCATTTTTATCCATAAGATTAGCGGATCCTACCTGACGCTTTTTATCGCAACTCTCTACTGTTTCTCCATATATCGACGGTTTCCATATGGTTTTAGAGCTAGAAATAGCAAGTTAAAATAAGGCTAGTCCGTTATCAACTTGAAAAAGTGGCACCGAGTCGGTGCTTAGCATCCAAACTCGAGTAAGGATCATTAAGGATCCCATGGTACGCGTGCTAGAGGCATCAAATAAAACGAAAGGCTCAGTCGAAAGACTGGGCCTTTCGTTTTATCTGTTGTTTGTCGGTGAACGCTCTCCCGAGTAGGACAAATCCGCCCCATGGGTATGGACAGTTTTCCCTTTGATATGTAAGTTGTTGTGCCACGCGGTTGGGCGCGCGCGCAAAGAGGGTTACGGACAGAACTACCGCGGCTGGGATCAGGAGGAGAAGATCGCCTCTATCGCCGTACCGCTGCGCAGTGAACAACGGGTGATTGGCTGTCTGAATCTGGTGTATATGGCGAGCGCAATGACCATTGAACAGGCAGCGGAAAAGCATCTTCCGGCGCTACAACGGGTAGCAAAACAGATCGAAGAAGGGGTTGAATCGCAGGCTATTCTGGTGGCCGGAAGGCGAAGCGGCATGCATTTACGTTGACACCATCGAATGGCGCAAAACCTTTCGCGGTATGGCATGATAGCGCCCGGAAGAGAGTCAATTCAGGGTGGTGAATGTGAAACCAGTAACGTTATACGATGTCGCAGAGTATGCCGGTGTCTCTTATCAGACCGTTTCCCGCGTGGTGAACCAGGCCAGCCACGTTTCTGCGAAAACGCGGGAAAAAGTGGAAGCGGCGATGGCGGAGCTGAATTACATTCCCAACAACGATTTTATCTAAAATAGTACGTTTCTTATTAAATTTATTTTTTAAGAAAAACATTAGGCTAATCTATTTGATAAAAATAGTGATAAGTAGAAATTTTCTAAAATATTTAGATTTATATAAGGTGGTAAATTCTCGTTATGGTTTTTTACATGAAAAATTAAATTAAATTATCAGAAATTAACAAAAGGATAGGCGCAAGTATATTATAGCAAAATGATAATATTAGTTTTATGAAAAAAATGCAGTTTATTTGTAATAATGTAAAATATAGGGGAAAAGAAAGCGCTTGACGACCTTTTGGACAAGTAGTAAGATACAAACATGGGCCCTGTAAATTAAAAATACTGCAGTAAAAGTGATTTTAGTTTAAAGGAGGAAATTCATTATGTGGTTTATGCCAATTATGGTGCAAAAAAAAGACTTTGAAGGTAAGGACTTTAAAGGTAAGATTGCATTAATTGAGCGTGGTGGTGGACTTGATTTTATGACTAAAATCACTCATGCTACAAATGCAGGTGTTGTTGGTATCGTTATTTTTAACGATCAAGAAAAACGTGGAAATTTTCTAATTCCTTACCGTGAATTACCTGTGGGGGTTATTAGTAAAGTAGATGGCGAGCGTATAAAAAATACTTCAAGTCAGTTAACATTTAACCAGAGTTTTGAAGTAGTTGATAGCCAAGGTGGCAATCGTATGCTGGAACAATCAAGTTGGGGCGTGACAGCTGAAGGAGCAATCAAGCCTGATGTAACAGCTTCTGGCTTTGAAATTTATTCTTCAACCTATAATAATCAATACCAAACAATGTCTGGTACAAGTATGGCTTCACCACATGTTGCAGGATTAATGACAATGCTTCAAAGTCATTTGGCTGAGAAATATAAAGGGATGAATTTAGATTCTAAAAAATTGCTAGAATTGTCTAAAAACATCCTCATGAGCTCAGCAACAGCATTATATAGTGAAGAGGATAAGGCGTTTTATTCACCACGTCAGCAAGGTGCAGGTGTAGTTGATGCTGAAAAAGCTATCCAAGCTCAATATTATGTTACTGGAAACGATGGCAAAGCTAAAATTAATCTCAAACGAGTGGGAGATAAATTTGATATCACAGTTACAATTCATAAACTTGTAGAAGGTGTCAAAGAATTGTATTATCAAGCTAATGTAGCAACAGAACAAGTAAATAAAGGTAAATTTGCCCTTAAACCACAAGCCTTGCTAGATACTAATTGGCAGAAAGTAATTCTTCGTGATAAAGAAACACAAGTTCGATTTACTATTGATTCTAGTCAATTTAGTCAGAAATTAAAAGAACAGATGGCAAATGGTTATTTCTTAGAAGGTTTTGTACGTTTTAAAGAAGCCAAGGATAGTAATCAGGAGTTAATGAGTATTCCTTTTGTAGGATTTAATGGTGATTTTGCGAACTTACAAGCACTTGAAACACCGATTTATAAGACGCT

PCR identification of the gene-edited *E. coli* DH5α-ORF4-GFP strain was performed using the HA-F/R primers described in Supplementary Material 1. Sanger sequencing was further conducted on E. coli DH5α-ORF4-GFP strain ① for verification.（5020 bp）

TAACCGGTGCTGATGGTCGCGAACCACTCACCGTTTCAGCCGCTTATCCTTTCACCGGGCAATGGTCGGGCGACGTTTGCCGCTTCTGAAAACCGCCTCGGGCCTGACCTGGCTGGCCTTTTGCCCGGAACAAGACCGCAAGGAATTAATCGAAATGTTAGCCTCCCGCCCCGGTGATGACTATCAACTGGCACGGGAACCGTTAAAGCTGGAAGCCATTCTGGCGCGCGCGCGCAAAGAGGGTTACGGACAGAACTACCGCGGCTGGGATCAGGAGGAGAAGATCGCCTCTATCGCCGTACCGCTGCGCAGTGAACAACGGGTGATTGGCTGTCTGAATCTGGTGTATATGGCGAGCGCAATGACCATTGAACAGGCAGCGGAAAAGCATCTTCCGGCGCTACAACGGGTAGCAAAACAGATCGAAGAAGGGGTTGAATCGCAGGCTATTCTGGTGGCCGGAAGGCGAAGCGGCATGCATTTACGTTGACACCATCGAATGGCGCAAAACCTTTCGCGGTATGGCATGATAGCGCCCGGAAGAGAGTCAATTCAGGGTGGTGAATGTGAAACCAGTAACGTTATACGATGTCGCAGAGTATGCCGGTGTCTCTTATCAGACCGTTTCCCGCGTGGTGAACCAGGCCAGCCACGTTTCTGCGAAAACGCGGGAAAAAGTGGAAGCGGCGATGGCGGAGCTGAATTACATTCCCAACAACGATTTTATCTAAAATAGTACGTTTCTTATTAAATTTATTTTTTAAGAAAAACATTAGGCTAATCTATTTGATAAAAATAGTGATAAGTAGAAATTTTCTAAAATATTTAGATTTATATAAGGTGGTAAATTCTCGTTATGGTTTTTTACATGAAAAATTAAATTAAATTATCAGAAATTAACAAAAGGATAGGCGCAAGTATATTATAGCAAAATGATAATATTAGTTTTATGAAAAAAATGCAGTTTATTTGTAATAATGTAAAATATAGGGGAAAAGAAAGCGCTTGACGACCTTTTGGACAAGTAGTAAGATACAAACATGGGCCCTGTAAATTAAAAATACTGCAGTAAAAGTGATTTTAGTTTAAAGGAGGAAATTCATTATGTGGTTTATGCCAATTATGGTGCAAAAAAAAGACTTTGAAGGTAAGGACTTTAAAGGTAAGATTGCATTAATTGAGCGTGGTGGTGGACTTGATTTTATGACTAAAATCACTCATGCTACAAATGCAGGTGTTGTTGGTATCGTTATTTTTAACGATCAAGAAAAACGTGGAAATTTTCTAATTCCTTACCGTGAATTACCTGTGGGGGTTATTAGTAAAGTAGATGGCGAGCGTATAAAAAATACTTCAAGTCAGTTAACATTTAACCAGAGTTTTGAAGTAGTTGATAGCCAAGGTGGCAATCGTATGCTGGAACAATCAAGTTGGGGCGTGACAGCTGAAGGAGCAATCAAGCCTGATGTAACAGCTTCTGGCTTTGAAATTTATTCTTCAACCTATAATAATCAATACCAAACAATGTCTGGTACAAGTATGGCTTCACCACATGTTGCAGGATTAATGACAATGCTTCAAAGTCATTTGGCTGAGAAATATAAAGGGATGAATTTAGATTCTAAAAAATTGCTAGAATTGTCTAAAAACATCCTCATGAGCTCAGCAACAGCATTATATAGTGAAGAGGATAAGGCGTTTTATTCACCACGTCAGCAAGGTGCAGGTGTAGTTGATGCTGAAAAAGCTATCCAAGCTCAATATTATGTTACTGGAAACGATGGCAAAGCTAAAATTAATCTCAAACGAGTGGGAGATAAATTTGATATCACAGTTACAATTCATAAACTTGTAGAAGGTGTCAAAGAATTGTATTATCAAGCTAATGTAGCAACAGAACAAGTAAATAAAGGTAAATTTGCCCTTAAACCACAAGCCTTGCTAGATACTAATTGGCAGAAAGTAATTCTTCGTGATAAAGAAACACAAGTTCGATTTACTATTGATTCTAGTCAATTTAGTCAGAAATTAAAAGAACAGATGGCAAATGGTTATTTCTTAGAAGGTTTTGTACGTTTTAAAGAAGCCAAGGATAGTAATCAGGAGTTAATGAGTATTCCTTTTGTAGGATTTAATGGTGATTTTGCGAACTTACAAGCACTTGAAACACCGATTTATAAGACGCTTTCTAAAGGTAGTTTCTACTATAAACCAAATGATACAACTCATAAAGACCAATTGGAGTACAATGAATCAGCTCCTTTTGAAAGCAACAACTATACTGCCTTGTTAACACAATCAGCGTCTTGGGGCTATGTTGATTATGTCAAAAATGGTGGGGAGTTAGAATTAGCACCGGAGAGTCCAAAAAGAATTATTTTAGGAACTTTTGAGAATAAGGTTGAGGATAAAACAATTCATCTTTTGGAAAGAGATGCAGCGAATAATCCATATTTTGCCATTTCTCCAAATAAAGATGGAAATAGGGATGAAATCACTCCCCAGGCAACTTTCTTAAGAAATGTTAAGGATATTTCTGCTCAAGTTCTAGATCAAAATGGAAATGTTATTTGGCAAAGTAAGGTTTTACCATCTTATCGTAAAAATTTCCATAATAATCCAAAGCAAAGTGATGGTCATTATCGTATGGATGCCCTTCAGTGGAGTGGTTTAGATAAGGATGGCAAAGTTGTAGCAGATGGTTTTTATACTTATCGTTTACGTTACACACCAGTAGCAGAAGGAGCAAATAGTCAGGAGTCAGACTTTAAAGTTCAAGTAAGTACTAAGTCACCAAATCTTCCTTCACGAGCTCAGTTTGATGAAACTAATCGAACATTAAGCTTAGCCATGCCTAAGGAAAGTAGTTATGTTCCTACATATCGTCTACAATTAGTTTTATCTCATGTTGTAAAAGATGAAGAATATGGAGATGAGACTTCTTACCATTATTTCCATATAGATCAAGAAGGTAAAGTGACACTTCCTAAAACAGTTAAGATAGGAGAGAGTGAGGTTGCAGTAGACCCTAAGACCTTGACACTTGTTGTGGAAGATAAAGCTGGTAATTTCGCAACGGTAAAATTGTTTGACCTCTTGAATAAGGCAGTAGTATCAGAGAAAGAAAACGCTATAGTAATTTCTAACAATTTCAAATATTTTGATAACTTGAAAAAAGAACCTATGTTTATTTTTAAAGAAGGAAAAGTAGTAAACAAGAATTTAGAAGAAATAGCATTAGTTAAGCCGCAAACTACAGTTACTACTCAATCATTGTTTAAAGAAATAACTCAATCAGGAAATGAGAAAGTCCTCACTTCTACAAACAATAATAGTAGCAGAGTAGCTAAGATCATATCACCTAAACATAACGGGGATTCTGTTAACCATACCTTACCTAGTACATCAGATAGAGCAACGAATGGTCTATTTGTTGGTACTTTGGCATTGTTATCTAGTTTACTTCTTTACTTGAAACCCAAAAAGACTAAAAATAATAGTAAAGGCGGTGGTGGCGGCTCCGGCGGTATGAGCAAAGGAGAAGAACTTTTCACTGGAGTTGTCCCAATTCTTGTTGAATTAGATGGTGATGTTAATGGGCACAAATTTTCTGTCCGTGGAGAGGGTGAAGGTGATGCTACAAACGGAAAACTCACCCTTAAATTTATTTGCACTACTGGAAAACTACCTGTTCCGTGGCCAACACTTGTCACTACTCTGACCTATGGTGTTCAATGCTTTTCCCGTTATCCGGATCACATGAAACGGCATGACTTTTTCAAGAGTGCCATGCCCGAAGGTTATGTACAGGAACGCACTATATCTTTCAAAGATGACGGGACCTACAAGACGCGTGCTGAAGTCAAGTTTGAAGGTGATACCCTTGTTAATCGTATCGAGTTAAAGGGTATTGATTTTAAAGAAGATGGAAACATTCTTGGACACAAACTCGAGTACAACTTTAACTCACACAATGTATACATCACGGCAGACAAACAAAAGAATGGAATCAAAGCTAACTTCAAAATTCGCCACAACGTTGAAGATGGTTCCGTTCAACTAGCAGACCATTATCAACAAAATACTCCAATTGGCGATGGCCCTGTCCTTTTACCAGACAACCATTACCTGTCGACACAATCTGTCCTTTCGAAAGATCCCAACGAAAAGCGTGACCACATGGTCCTTCTTGAGTTTGTAACTGCTGCTGGGATTACACATGGCATGGATGAGCTCTACAAATAGCCGATCAATGGGGATTGGTGGCGACGACTCCTGGAGCCCGTCAGTATCGGCGGAATTCCAGCTGAGCGCCGGTCGCTACCATTACCAGTTGGTCTGGTGTCAAAAATAATAATAACCGGGCAGGCCATGTCTGCCCGTATTTCGCGTAAGGAAATCCATTATGTACTATTTAAAAAACACAAACTTTTGGATGTTCGGTTTATTCTTTTTCTTTTACTTTTTTATCATGGGAGCCTACTTCCCGTTTTTCCCGATTTGGCTACATGACATCAACCATATCAGCAAAAGTGATACGGGTATTATTTTTGCCGCTATTTCTCTGTTCTCGCTATTATTCCAACCGCTGTTTGGTCTGCTTTCTGACAAACTCGGGCTGCGCAAATACCTGCTGTGGATTATTACCGGCATGTTAGTGATGTTTGCGCCGTTCTTTATTTTTATCTTCGGGCCACTGTTACAATACAACATTTTAGTAGGATCGATTGTTGGTGGTATTTATCTAGGCTTTTGTTTTAACGCCGGTGCGCCAGCAGTAGAGGCATTTATTGAGAAAGTCAGCCGTCGCAGTAATTTCGAATTTGGTCGCGCGCGGATGTTTGGCTGTGTTGGCTGGGCGCTGTGTGCCTCGATTGTCGGCATCATGTTCACCATCAATAATCAGTTTGTTTTCTGGCTGGGCTCTGGCTGTGCACTCATCCTCGCCGTTTTACTCTTTTTCGCCAAAACGGATGCGCCCTCTTCTGCCACGGTGCCAATGCGGTAGGCCCGTGCTTCT
