# Supplementary material
Source: Research Square preprint supplement (doi:10.21203/rs.3.rs-9209433/v1)
Supplement: Supplementary file 2 [file a9f40bbdee3cdc606fa02c71.xlsx]

## Sheet: S1
	Table S1. Strains ,Plasmids and Primers used in this study.
	Strain	Description	Reference
	E. coli DH5a	F- (80d lacZ M15) (lacZYA-argF) U169 hsdR17 (r- m+) recA1 endA1 relA1 deoR
	S. agalactiae HN016	Streptococcus agalactiae HN016, a virulent ST-7/serotype Ia tilapia pathogen	Rui W et al., 20151
	DH5α-ORF4-GFP	E. coli DH5α harboring the biosynthetic gene cluster of ORF4-GFP fusion protein	This study
	Plasmid	Description	Reference
	p15A-PBAD-Cas9-PT5-Redγβα	Red recombinase and Cas9 protein expression plasmids, repA, p15A ori, PBAD, gam, beta exo, recA,KanR,Laci，SacB,Cas9,arac	Huang et al., 20201
	pSC101-PBAD-sgRNA-Donor26D	SgRNA expression plasmid, rep101, pSC101ori, AmpR	Huang et al., 20201
	pBAV1K-T5-sfGFP	Green fluorescent expression plasmid	HonorGene
	pSC101-PBAD-SgRNA-ORF4-GFP	Dual sgRNA expression cassettes, homology arm-insert gene cassette	This study
	Primer	Sequence (5`~3`)	Reference	PCR template
	yw1-F	TTGTTGTGCCACGCGGTTGTTTTAGAGCTAGAAATAGCAAG	This study	pSC101-PBAD-sgRNA-Donor26D
	yw1-R	GTTATCCCTAATCCTTTTTGATAATCTCATGACCAAAATCCC	This study
	yw2-F	CAAAAAGGATTAGGGATAACAGGGTAATACTTTTCATACTCCC	This study
	yw2-R	TCTAAAACCATATGGAAACCGTCGATATATGGAGAAACAGTAGAGAGTTG	This study
	yw3-F	TTTCCATATGGTTTTAGAGCTAGAAATAGCAAGTTAAAAT	This study
	yw3-R	CGCGCGCCCAACCGCGTGGCACAACAACTTACATATCAAAGGGAAAACTGTCCATAC	This study
	LHA-F	CACGCGGTTGGGCGCGCGCGCAAA	This study	E. coli DH5a
	LHA-R	TAAAATCGTTGTTGGGAATGTAATTCAGCTCC	This study
	QDZ-F	CATTCCCAACAACGATTTTATCTAAAATAGTACGTTTCTTATT	This study	S. agalactiae HN016
	QDZ-R	TAAACCACATAATGAATTTCCTCCTTTAAACTAAAATCAC	This study
	ORF4-F	GAAATTCATTATGTGGTTTATGCCAATTATGGT	This study	S. agalactiae HN016
	ORF4-R	TGGTGAGAATTTAAACTGAACTTTTCATCATATTGCAG	This study
	GFP-F	TTCAGTTTAAATTCTCACCAGGTATCGGTTTAACGGGAGTTGC	This study	pBAV1K-T5-sfGFP
	GFP-R	CACCAATCCCCATTGATCGGCTATTTGTAGAGCTCATCCATGCC	This study
	RHA-F	CCGATCAATGGGGATTGGTGGC	This study	E. coli DH5a
	RHA-R	GGTTCCGCGATATCGACGGTTTCCATATGGGGAAGCCTAGATAAATACCACCAAC	This study
	yw4-F	CCGTCGATATCGCGGAACCCCTATTTG	This study	pSC101-PBAD-sgRNA-Donor26D
	yw4-R	TATGAAAAGTGTGGAACGAAAACTCACGTTAAGGG	This study
	yw5-F	TTCGTTCCACACTTTTCATACTCCCGCCATTCAG	This study
	yw5-R	AACCGCGTGGCACAACAACTATGGAGAAACAGTAGAGAGT	This study
	HA-F	GCCGACAGATGTGTCCACG	This study	DH5α-ORF4-GFP
	HA-R	CCAGTGCCAGCTTAAGGCTA	This study
	Reference
	1	Rui W ,Liping L ,Yan H , et al.Comparative genome analysis identifies two large deletions in the genome of highly-passaged attenuated Streptococcus agalactiae strain YM001 compared to the parental pathogenic strain HN016.[J].BMC genomics,2015,16(1):897.DOI:10.1186/s12864-015-2026-y.
	2	Huang, C., et al., Efficient long fragment editing technique enables large-scale and scarless bacterial genome engineering. Applied Microbiology and Biotechnology, 2020. 104(18): p. 7943-7956.

## Sheet: S2
Protective efficacy of DH5α-ORF4-GFP live vaccine against Streptococcus agalactiae in tilapia using different immunization methods
Treatment	Immunization route	Viable vaccine concentration	Immunization times (times)	Challenge dose/fish	Challenge time	No. dead/ No.totala	Mean Mortality/%	RPS/%
PC	Injection	0.1ml PBS	1	3×108	7	7/10	70
NC	Injection	0.1ml PBS	1	0	7	10/10	0	100
DH5α	Injection	0.1ml 1.5×108 CFU	1	3×108	7	8/10	80	0
DH5α-ORF4-GFP	Injection	0.1ml 1.5×108 CFU	1	3×108	7	3/13	23.08	67.03
DH5α-ORF4-GFP	via feed	1.5×106 CFU/g feed	1	3×108	7	5/13	38.46	45.05
DH5α-ORF4-GFP	Immersion	1.5×103 CFU/ml	1	3×108	7	4/12	33.33	52.38
a: Fish were challenged 15 d post-immunization with 3×108 CFU/fish of HN016 strain andmonitored for 7 days post challenge. RPS: Relative percent survival. PC:Positive Control Group. NC:Negative Control Group,fish were intraperitoneally injected with 0.2 mL of sterile PBS.

## Sheet: S3
bacterial virulence tests
Treatment	Immunization route	Viable vaccine concentration	Immunization times (times)	Observation period post-immunization	No. dead/ No.totala
DH5α-ORF4-GFP	Immersion	1.5×106 CFU/ml	1 h	14 d	3/20
DH5α-ORF4-GFP	Immersion	1.2×105 CFU/ml	1 h	14 d	2/21
DH5α-ORF4-GFP	Immersion	1.5×104 CFU/ml	1 h	14 d	0/20
